1 eNOS-dependent S-nitrosylation of the NF- $\kappa$ B subunit p65 has  
2 neuroprotective effects

3

4 Ariel Caviedes<sup>1#</sup>, Barbara Maturana<sup>1#</sup>; Katherina Corvalán<sup>1</sup>; Alexander Engler<sup>2</sup>; Felipe  
5 Gordillo<sup>3</sup>; Manuel Varas-Godoy<sup>4</sup>; Karl-Heinz Smalla<sup>5</sup>; Luis Federico Batiz<sup>1</sup>; Carlos  
6 Lafourcade<sup>1</sup>; Thilo Kaehne<sup>2</sup> and Ursula Wyneken<sup>1</sup>

7

8 <sup>1</sup>Laboratorio de Neurociencias, Universidad de Los Andes, Santiago, Chile

9 <sup>2</sup> Institute of Experimental Internal Medicine, Otto-von-Guericke University, Magdeburg,  
10 Germany

11 <sup>3</sup> Universidad Católica del Maule, Chile

12 <sup>4</sup> Cancer Cell Biology Lab, Centro de Biología Celular y Biomedicina (CEBICEM),  
13 Facultad de Medicina y Ciencia, Universidad San Sebastián, Lota 2465, Santiago 7510157,  
14 Chile

15 <sup>5</sup>Leibniz Institute for Neurobiology, Magdeburg, Germany

16

17 # Both authors contributed equally to this work

18 \* Corresponding author: Ursula Wyneken, Laboratorio de Neurociencias, Facultad de  
19 Medicina, Universidad de los Andes; Mons. Alvaro del Portillo 12.455, Las Condes;  
20 Santiago, Chile; phone: +56 2 26181353; e-mail: [uwyneken@uandes.cl](mailto:uwyneken@uandes.cl)

21 RUNNING TITLE: NF- $\kappa$ B S-nitrosylation is neuroprotective

22

23 **Abstract.**

24 Cell death by glutamate excitotoxicity, mediated by N-methyl-D-aspartate (NMDA)  
25 receptors, negatively impacts brain function, including but not limited to hippocampal  
26 neurons. The NF- $\kappa$ B transcription factor (composed mainly of p65/p50 subunits) contributes  
27 to neuronal death in excitotoxicity, while its inhibition should improve cell survival. Using  
28 the biotin switch method, subcellular fractionation, immunofluorescence and luciferase  
29 reporter assays, we found that NMDA stimulated NF- $\kappa$ B activity selectively in hippocampal  
30 neurons, while endothelial nitric oxide synthase (eNOS), an enzyme expressed in neurons, is  
31 involved in the S-nitrosylation of p65 and consequent NF- $\kappa$ B inhibition in cerebrocortical,  
32 *i.e.*, resistant neurons. The S-nitro proteomes of cortical and hippocampal neurons revealed  
33 that different biological processes are regulated by S-nitrosylation in susceptible and resistant  
34 neurons, bringing to light that protein S-nitrosylation is a ubiquitous post-translational  
35 modification, able to influence a variety of biological processes including the homeostatic  
36 inhibition of the NF- $\kappa$ B transcriptional activity in cortical neurons exposed to NMDA  
37 receptor overstimulation.

38

39 Key words: NMDA, S-nitrosylation, proteomics

40

41 **Introduction.**

42 Neuronal death by glutamate excitotoxicity is implicated in the pathogenesis of several  
43 neurological disorders, ranging from neurodegeneration to epilepsy, stroke and traumatic  
44 brain injury<sup>1,2</sup>. Overstimulation by glutamate leads to massive calcium influx, mainly through  
45 N-methyl-D-aspartate receptors (NMDA-Rs), triggering several intracellular pro-death  
46 signaling pathways<sup>3</sup>. Endogenous/homeostatic protective mechanisms in response to  
47 glutamate, are incompletely known.

48 In that line, the nuclear factor kappa B (NF- $\kappa$ B) family of transcription factors has been  
49 implicated in excitotoxicity in the retina, the striatum, cerebral cortex and hippocampus<sup>4,5,6</sup>.

50 This is associated with induction of pro-apoptotic and pro-inflammatory genes, including IL-  
51 1 $\beta$ . The canonical activation of NF- $\kappa$ B depends on phosphorylation and degradation of I $\kappa$ B  
52 proteins, leading to release and nuclear translocation of NF- $\kappa$ B, a dimer composed most  
53 frequently of a p65 and a p50 subunit<sup>7,8</sup>. Its transcriptional activity in the nucleus is inhibited

54 by S-nitrosylation (*i.e.*, the reversible coupling of nitric oxide (NO) to cysteine residues) of  
55 the p65 cysteine 38 residue<sup>9,10,11</sup>. However, the contribution of this signaling mechanism to  
56 excitotoxicity is unknown. The main source of NO in the brain are nitric oxide synthases,  
57 *i.e.*, the neuronal (nNOS), endothelial (eNOS) and inducible (iNOS) enzymes<sup>12,13,14</sup>.  
58 Considering the novel finding that eNOS is present in neurons and synapses<sup>15</sup>, we examined  
59 whether eNOS is involved in p65 S-nitrosylation and, thus, in the regulation of its  
60 transcriptional activity under excitotoxicity-promoting conditions. We compared primary  
61 cultures of hippocampal and cortical neurons, which differ in their vulnerability to  
62 excitotoxic insults: hippocampal neurons have a higher sensitivity than cortical neurons<sup>16</sup>.  
63 We found that eNOS contributes to p65 S-nitrosylation and is associated with  
64 neuroprotection. This homeostatic mechanism is not active in hippocampal neurons, in which  
65 NF- $\kappa$ B activation after an excitotoxic insult leads to increased nuclear translocation and  
66 transcriptional activity, including increased transcription of the pro-inflammatory cytokine  
67 IL-1 $\beta$ . Our results show that NF- $\kappa$ B activity can be regulated by an eNOS dependent  
68 endogenous neuroprotective mechanism in excitotoxicity-like conditions.

## 69 **Results.**

### 70 **NF- $\kappa$ B activation in cortical and hippocampal cultures after NMDA stimulation.**

71 To assess the participation of NF- $\kappa$ B under excitotoxicity-promoting conditions, we studied  
72 the activation and nuclear translocation of p65 in 30 or 100  $\mu$ M NMDA-stimulated cortical  
73 and hippocampal cultures (Figure 1). These cultures contain approximately 30% of astrocytes  
74 in addition to neurons<sup>17</sup>. We first assessed cell viability following incubation with different  
75 NMDA concentrations (Supplemental Figure S1D): a one hour incubation with any NMDA  
76 concentration did not induce cell death in cortical cultures. In turn, in hippocampal cultures,  
77 30  $\mu$ M NMDA did not induce death while 100  $\mu$ M NMDA was able to produce substantial  
78 cell death when measured 24 hours later. These results are consistent with several reports  
79 indicating a time- and concentration dependence of NMDA receptor overstimulation to  
80 observe cell death<sup>18,19,20</sup>. We selected 30  $\mu$ M to 100  $\mu$ M NMDA for one hour to test the  
81 mechanistic steps that participate in the initiation of excitotoxic pathways and that  
82 subsequently progress to cell death<sup>21</sup>.

83 We first quantified the nuclear translocation of p65. Based on the distribution of a nuclear  
84 (*i.e.*, Laminin B) and a cytoplasmic (*i.e.*, GAPDH) marker, we could conclude that a reliable

85 separation of nuclei from cytoplasm was obtained (Supplemental Figure S1E). In Figures 1A  
86 and 1B, representative Western blots of p65 and its phosphorylated form in the nuclear  
87 fractions are shown, where Laminin B was used as a loading control. Note that p65 phospho-  
88 serine 536 is considered a general marker of NF- $\kappa$ B activation, especially of the canonical  
89 pathway<sup>22</sup>. The densitometric analysis of the Western blots (Figures 1C and 1D) confirmed  
90 that p65 increased in the nuclear fractions of hippocampal neurons (HP, white bars), but not  
91 in cortical neurons (CX, black bars) exposed to the same NMDA concentrations.  
92 Interestingly, this was not accompanied by any changes in the levels of phospho-serine 536,  
93 indicating that the nuclear translocation of p65 in our experimental model was independent  
94 of this phosphorylation site. To determine whether astrocytes contributed to nuclear  
95 translocation in the hippocampal cultures, we used immunofluorescence to detect p65 in  
96 DAPI-stained nuclei of neurons (labelled with an antibody against microtubule associated  
97 protein 2, MAP2) or astrocytes (labelled with an antibody against glial fibrillary associated  
98 protein, GFAP) (Supplemental Figure S2). Consistent with the previous observations, we  
99 found that 30  $\mu$ M NMDA induced an increase in the nuclear content of p65 in both neurons  
100 and astrocytes in hippocampal cultures (arrows point to cell nuclei in each culture type and  
101 experimental condition). No translocation was observed in cortical cell cultures in either cell  
102 type.

103 To evaluate the transcriptional activity of NF- $\kappa$ B, we used the NF- $\kappa$ B luciferase reporter  
104 assay (Figure 1E and F). Consistent with the previous results, NF- $\kappa$ B transcriptional activity  
105 increased in hippocampal neurons exposed to 100  $\mu$ M NMDA, while no effects were  
106 observed in cortical cells. To test whether NF- $\kappa$ B activation is associated with cell death, we  
107 used the NF- $\kappa$ B inhibitor Ro 106-9920 (Figure 2) at a concentration of 2  $\mu$ M for one hour,  
108 not affecting neuronal cell survival *per se* under our experimental conditions (Figure 2A),  
109 which is consistent with previous concentration and time-dependence studies using this  
110 inhibitor<sup>23,24</sup>. Hippocampal cell death induced by 100  $\mu$ M NMDA was prevented by NF- $\kappa$ B  
111 inhibition with 2  $\mu$ M Ro106-9920 (Figure 2B-C). Surprisingly, cell death in the cortical  
112 cultures (*i.e.*, resistant to 100  $\mu$ M NMDA) increased in the presence of NF- $\kappa$ B inhibition,  
113 suggesting opposing roles in neurotoxicity/neuroprotection of NF- $\kappa$ B.

114 **S-nitrosylation of p65 increased in cortical cell cultures after NMDA.**

115 We then evaluated a potential regulation of the NF- $\kappa$ B p65 subunit by S-nitrosylation using  
116 the biotin switch assay<sup>25</sup>. Efficacy of all protocol steps was controlled by Western blot and  
117 protein staining (Supplemental Figure S1A-C). Interestingly, the pull down revealed that S-  
118 nitrosylation of p65 increased in cortical cells after 30  $\mu$ M NMDA, while in hippocampal  
119 cells the opposite effect was observed (Figure 3). This result supports the idea that regulation  
120 of p65 activity by S-nitrosylation is a dynamic post-translational modification. In other  
121 experimental models, increased p65 S-nitrosylation is associated with decreased  
122 transcriptional activity<sup>9,10,11</sup>.

123 To evaluate the putative functional effects p65 S-nitrosylation, we directly altered p65 S-  
124 nitrosylation by decreasing NO levels by inhibition of nitric oxide synthases (NOS). We  
125 focused particularly on eNOS, previously described by us to be expressed in neurons<sup>15</sup>. We  
126 measured the eNOS-dependent NO production in cortical cultures transfected with a shRNA  
127 targeting eNOS<sup>15</sup>. To stimulate NO production, the neurotrophin BDNF was used<sup>16</sup>. In the  
128 presence of the sh-eNOS RNA (but not of a sequence targeting Luciferase as a control), the  
129 production of NO decreased, as revealed by the respective slopes (Figure 4A-B).

130 Following, we tested whether decreased endogenous NO production could affect the S-  
131 nitrosylation of p65 and tubulin1A, which have been shown to be NO targets<sup>26,27</sup> (Figure 4C-  
132 D). In fact, after using the biotin-switch assay of neuronal cultures transfected with sh-eNOS  
133 RNA, it was revealed that the S-nitrosylation of p65 and tubulin1A decreased markedly with  
134 respect to the sh-Luc controls in cortical and hippocampal cultures. Thus, we conclude that  
135 eNOS significantly contributes to the observed protein S-nitrosylation.

136

137 **NO regulates transcriptional activity of NF- $\kappa$ B but not its nuclear translocation in**  
138 **response to NMDA stimulation.**

139 Although it is known that NO inhibits the transcriptional activity of NF- $\kappa$ B<sup>11</sup>, this type of  
140 regulation has not yet been observed in neurons. Moreover, it is unknown whether NO affects  
141 nuclear translocation. Therefore, we measured nuclear translocation and NF- $\kappa$ B activity  
142 using the general NOS inhibitor LNIO at a concentration of 10  $\mu$ M (Figure 5)<sup>28,29</sup>. In Figure  
143 5A, we show in nuclear fractionation experiments followed by Western blots that the levels  
144 of p65 do not change among the experimental conditions. Moreover, in hippocampal cells  
145 the nuclear increase of p65 after 100  $\mu$ M NMDA could not be prevented by 10  $\mu$ M LNIO

146 application, suggesting that nuclear translocation is not affected by S-nitrosylation. To  
147 evaluate putative changes in p65 expression levels, we compared total p65 within the cellular  
148 homogenates. The constant expression levels clearly indicate that the increased nuclear  
149 content is a result of enhanced translocation (Supplemental Figure S3A-B). In that line, we  
150 also measured the I $\kappa$ B- $\alpha$  levels in the cytoplasm, and we did not find significant differences  
151 among groups (Supplemental Figure S3C-D).

152 To further investigate whether NOS inhibition affected the transcriptional activity of NF- $\kappa$ B,  
153 we used the luciferase reporter system (Figures 5 C-D). In cortical cultures, the presence of  
154 10  $\mu$ M LNIO led to increased transcriptional activity after 100  $\mu$ M NMDA stimulation.  
155 Similar effects were observed in hippocampal cultures. This suggests that NOS-dependent  
156 NO synthesis leads to NF- $\kappa$ B inhibition. Consistently, the NO donor SNAP (10  $\mu$ M) had an  
157 inhibitory effect on NF- $\kappa$ B activity after 100  $\mu$ M NMDA (Figure 5E) <sup>16,30</sup>.

158 Finally, by measuring mRNA levels of known NF- $\kappa$ B downstream pro- or anti-apoptotic  
159 genes (BAX, Caspase 11, Bcl2) using qPCR, we investigated whether NF- $\kappa$ B activation after  
160 100  $\mu$ M NMDA in hippocampal neurons was associated with enhanced transcription.  
161 Surprisingly, we did not detect any changes in the mRNA levels of these genes (not shown),  
162 while changes were observed in the mRNA levels of the pro-inflammatory cytokine IL-1 $\beta$ .  
163 In time course experiments, we could detect that IL-1 $\beta$  increased after 2 hours of stimulation  
164 with 100  $\mu$ M NMDA (Supplemental Figure S4), and this was inhibited in the presence of the  
165 NF- $\kappa$ B inhibitor Ro 106-9920 (2  $\mu$ M) (Figure 5F). In a different set of experiments, it was  
166 observed that the NO donor SNAP (10  $\mu$ M) also inhibited the increased transcription of IL-  
167 1 $\beta$  after 100  $\mu$ M NMDA (Figure 5G). These results suggest that NF- $\kappa$ B activation in  
168 hippocampal neurons induces the transcription of the pro-inflammatory cytokine IL-1 $\beta$ ,  
169 while this can be prevented using a NO donor to promote the inhibitory S-nitrosylation of  
170 NF- $\kappa$ B. Alternatively, other regulatory proteins of the NF- $\kappa$ B pathway could also be NO  
171 targets. In order to assess whether S-nitrosylation can be considered a more general  
172 mechanism regulating the outcome of excitotoxic stimuli, we analyzed the S-nitrosylated  
173 proteome in cortical and hippocampal cultures after NMDA.

#### 174 **Detection of S-nitrosylated proteins by mass spectrometry.**

175 Hippocampal and cortical cultures were incubated in the presence or absence of 30  $\mu$ M  
176 NMDA to pull down S-nitrosylated proteins using the biotin switch assay (Figure 6).

177 Interestingly, we found that, in hippocampal neurons, a lower number of proteins were  
178 detected (178 proteins in hippocampal neurons *versus* 360 proteins cortical neurons) (Figure  
179 6A and Supplemental Table 2). To exclude technical issues resulting in the detection of lower  
180 number of proteins in hippocampal cultures, we carefully ascertained that equal quantities of  
181 inputs were used (*i.e.*, Supplemental Figure S1). These results suggest that protein S-  
182 nitrosylation levels are elevated in cortical neurons, both under control and excitotoxicity  
183 conditions, compared to hippocampal cultures. The respective Venn diagrams (Figure 6C)  
184 revealed that in cortical cultures, 41 and 64 proteins, respectively, were identified exclusively  
185 in control or 30  $\mu$ M NMDA-stimulated cortical cultures, while in hippocampal neurons  
186 (Figure 6D), 8 and 40 exclusive proteins were found. After 30  $\mu$ M NMDA exposure, 226  
187 proteins were restricted to cortical and 77 proteins to hippocampal cultures (Figure 6 B). To  
188 find out which biological processes were selectively affected by NMDA in both culture types,  
189 a meta-analysis using the protein lists obtained after NMDA stimulation revealed that  
190 different biological processes were affected in each case (Figure 6E). Interestingly, in cortical  
191 cells, the S-nitrosylation (and consequent inhibition) of the proteasome subunits may  
192 contribute to decreased proteasomal degradation of the NF- $\kappa$ B inhibitor I $\kappa$ B $\alpha$ , thus providing  
193 an additional level of NF- $\kappa$ B inhibition in cortical excitotoxicity<sup>31,32</sup>. On the other hand, in  
194 hippocampal neurons, a functional cluster involved in actin filament capping or brain  
195 development stands out. In neurons, the actin cytoskeleton plays a major role in membrane  
196 remodeling, organelle trafficking and excitotoxicity<sup>19,33</sup>. The role of S-nitrosylation of actin  
197 cytoskeleton associated regulatory or motor proteins has not yet been assessed in neurons,  
198 although in cardiomyocytes, their S-nitrosylation leads to inhibition, *i.e.*, lower calcium  
199 sensitivity and decreased muscle contraction<sup>34,35,36</sup>.

200 We also determined whether a difference in protein S-nitrosylation between both culture  
201 types could be detected in already well-validated NO targets. Thus, we quantified the S-  
202 nitrosylation of the NMDA receptor subunit GluN2A<sup>37</sup> and the scaffolding protein PSD95  
203 <sup>38</sup>. Furthermore, we included the synapse associated protein SAPAP4, a scaffolding protein  
204 that had been detected by us in a previous S-nitrosyl proteome (unpublished) (Figure 6F-G).  
205 The S-nitrosylation of the synaptic proteins GluN2A and PSD95 was increased in both  
206 culture types after NMDA. Interestingly, S-nitrosylated SAPAP4 increased in cortical

207 cultures, while no changes were observed in hippocampal cells, showing that in addition to  
208 p65, NO has different protein targets in the two cell types.

209 Finally, our results can be summarized in the model presented in Figure 7.

## 210 **Discussion.**

211 In this work, we show that eNOS-dependent p65 S-nitrosylation after NMDA receptor  
212 overstimulation is neuroprotective. Previously, NO has been proposed as a promising  
213 therapeutic target for dealing with excitotoxic insults in the developing brain<sup>39</sup>. Moreover,  
214 in several preclinical models of ischemic stroke followed by reperfusion, or of traumatic  
215 brain injury, increasing eNOS-dependent NO production or the cerebral NO levels, either by  
216 using NO donors or NO inhalation, has neuroprotective effects<sup>40</sup>. In recent studies, NO-  
217 mediated protection has been shown in cerebellar granule neurons<sup>41</sup> and in a testicular  
218 ischemia/reperfusion model<sup>42</sup> while eNOS-dependent NO production protected the  
219 neurovascular unit and ameliorated neurological deficits<sup>43,44</sup>. Moreover, NO was  
220 neuroprotective in various animal models of Parkinson Disease, after oxygen glucose  
221 deprivation or cerebral ischemia/reperfusion injury and this effect depended on a reduction  
222 in reactive oxygen species and protein S-nitrosylation in brain mitochondria<sup>45,46</sup>, while in a  
223 pharmacological study, neuroprotection occurred in a PI3K/Akt dependent manner<sup>47</sup>.  
224 Interestingly, NO-signaling deficiency may contribute importantly to age-related cognitive  
225 impairment<sup>48</sup>. In turn, and in accordance with our data, brain ischemia induced a deleterious  
226 elevation of NO and NOS in the hippocampus<sup>49</sup>. Thus, our results add to our understanding  
227 of neuronal mechanisms that participate in NO mediated neuroprotection, which, we hope,  
228 will help in the development of novel therapeutic strategies aimed at inhibiting harmful NF-  
229  $\kappa$ B activity in acute and chronic neurodegenerative disorders<sup>50</sup>.

230

## 231 **NF- $\kappa$ B and eNOS-dependent NO production in the cerebral cortex**

232 The neurotrophin BDNF and its tropomyosin-related kinase receptor TrkB, a signaling system  
233 associated importantly with improvement of cognitive functions in the central nervous system, is  
234 known to activate eNOS in endothelial cells<sup>51,52</sup>. Thus, we used BDNF to stimulate eNOS-  
235 dependent neuroprotective NO synthesis in our cell model<sup>16</sup>. Consistent with our results, the  
236 restitution of BDNF/TrkB signaling after a stroke enhanced neuroprotection in the cerebral  
237 cortex<sup>53</sup>. Moreover, further recent studies have confirmed functional implications of eNOS



238 expression in neurons<sup>54</sup>. We focused on NF- $\kappa$ B, a known target of NO and also implicated  
239 in both neuroprotective and neurotoxic effects.

240 Constitutive NF- $\kappa$ B activity has been described in the cerebral cortex, hippocampus,  
241 amygdala, cerebellum, hypothalamus and olfactory bulbs<sup>7,8</sup>. In *in vivo* experiments using a  
242 transgenic mouse model in which NF- $\kappa$ B expression was measured by  $\beta$ -galactosidase  
243 activity, high constitutive expression was found in the CA1, CA2 and dentate gyrus regions  
244 of the hippocampus, while lower levels were found in the cerebral cortex<sup>55</sup>. This constitutive  
245 activity is beneficial for neuronal survival, as well as for learning and memory, and, thus,  
246 might favor the transcription of genes involved in these processes. However, NF- $\kappa$ B  
247 activation favored cell death or damage in pathophysiological models that involve NMDA  
248 receptor overactivation<sup>56,57,58</sup> while it resulted neuroprotective in cortical neurons both in  
249 vitro and in vivo<sup>21</sup>. It is unknown how an excitotoxic insult might switch NF- $\kappa$ B activity to  
250 promote the expression of deleterious or pro-inflammatory proteins<sup>59</sup>. One possibility is that  
251 different post-translational modifications that act in concert, also known as the “bar code”  
252 for NF- $\kappa$ B activation, determine this switch<sup>60</sup>. In such a way, the interaction of S-  
253 nitrosylation with phosphorylation, which is importantly regulated under excitotoxic  
254 conditions, remains unexplored<sup>19</sup>.

255 In addition to p65, the p50 subunit of NF- $\kappa$ B can be S-nitrosylated at the highly conserved  
256 cysteine 62 residue, and, similarly to p65 modification, this results in the inhibition of its  
257 DNA binding capacity, contributing to NF- $\kappa$ B inhibition<sup>10,11,61</sup>. Another component of the  
258 NF- $\kappa$ B pathway that can be S-nitrosylated is the inhibitor of NF- $\kappa$ B (I $\kappa$ B) kinase (IKK)  
259 complex, the main kinase complex responsible for the phosphorylation of the I $\kappa$ B- $\alpha$  protein.  
260 The IKK complex is composed of the two catalytic subunits IKK- $\alpha$  and IKK- $\beta$  and the  
261 regulatory subunit IKK- $\gamma$ . The S-nitrosylation of the cysteine 179 residue of the IKK- $\beta$   
262 subunit results in the inhibition of the kinase activity of the IKK complex and consequently  
263 the lack of I $\kappa$ B- $\alpha$  protein phosphorylation, thus preventing activation of NF- $\kappa$ B<sup>62</sup>. In  
264 consequence, enhanced protein S-nitrosylation of different NF- $\kappa$ B pathway components  
265 converge on its inhibition. Because of the dearth of NF- $\kappa$ B molecules and their regulators  
266 compared to other proteins, *e.g.*, those of the cytoskeleton, we failed to detect them on the  
267 mass spectrometric screens of S-nitrosylated proteins. Remarkably, even the most up-to-date  
268 and most sensitive approach to demonstrating S-nitrosylation (*i.e.* Cys-BOOST, bio-

269 orthogonal cleavable-linker-based enrichment and switch technique), was not capable of  
270 detecting any NF- $\kappa$ B associated molecules so far<sup>63</sup>. Moreover, when separating neuronal cell  
271 nuclei to obtain enrichment of S-nitrosylated nuclear proteins and a higher chance to detect  
272 less abundant proteins, NF- $\kappa$ B remained hidden<sup>64</sup>.

273

#### 274 **The SNO proteome after excitotoxicity.**

275 S-nitrosylation of proteins is the principal cGMP-independent mode of action of NO. The S-  
276 nitrosylation of redox-sensitive cysteins has been described in thousands of proteins that  
277 regulate a variety of biological functions<sup>63,65</sup>. In total, our MS-based S-nitrosylation screen  
278 identified 445 different proteins. Hierarchical gene ontology (GO)-based clustering of those  
279 proteins (Supplemental Table 3) revealed a strong participation in metabolic processes,  
280 including glycolysis, tricarboxylic acid cycle, 2-oxoglutarate process, ATP biosynthetic  
281 process and carbohydrate metabolic process. This ranking was followed by increased S-  
282 nitrosylation of mitochondrial proteins modulating their function, including negative effects  
283 on the electron transport chain, alteration in the mitochondrial permeability transition pore  
284 and enhanced mitochondrial fragmentation and autophagy<sup>66</sup>. However, proteins participating  
285 in neuron projection development and brain development as well as in synapse associated  
286 processes, with roles in synaptic transmission, neurotransmitter transport and ionotropic  
287 glutamate receptor signaling, are within the top 35 of this list. This indicates that, besides  
288 metabolic processes, even basic neuronal mechanisms are regulated by S-nitrosylation. The  
289 current view is that under conditions of normal NO production, S-nitrosylation regulates the  
290 activity of many normal proteins; however, increased levels of NO, as experimentally  
291 induced by lasting NMDA stimulation, led to aberrant S-nitrosylation, thus contributing to  
292 the pathogenesis of neurodegenerative disorders<sup>67</sup>. Remarkably, in this context, we found  
293 increases in the GO terms “protein phosphorylation” and “protein autophosphorylation”  
294 (Supplemental Table 3) after NMDA. S-nitrosylated proteins belonging to these terms  
295 include important serine kinases, including CaMK2d, GSK3 $\beta$ , Akt1 and MAPKinases, but  
296 also tyrosine kinases like Fyn and Src. This result indicates that regulation of kinase activity  
297 by S-nitrosylation might contribute to the NMDA-induced phosphoproteome<sup>19</sup> and in the  
298 case of NF- $\kappa$ B, this would contribute to the generation of the “bar code” specifying its  
299 transcriptional targets. For example, S-nitrosylation of Src overrides an inhibitory

300 phosphorylation motif leading to a phosphorylation independent activation of this kinase<sup>68,69</sup>.  
301 Moreover, S-nitrosylation of CaMKII, a central neuronal kinase implicated synaptic  
302 plasticity, can induce its Ca<sup>2+</sup> independent activation<sup>70</sup>, while the opposite effect, was also  
303 described<sup>71</sup>. But it is beyond doubt that S-nitrosylation can strongly modulate the activity of  
304 key kinases in neurons that, in turn, are known NF-κB regulators<sup>8,72</sup>.  
305 Our results show that sustained NMDA receptor activation results in a substantially modified  
306 S-nitrosylation proteome in neurons. In them, protein clusters that regulate the NF-κB  
307 pathway were found, *e.g.*, S-nitrosylation of proteasomal proteins causes its inhibition and,  
308 therefore, decreased degradation of IκB should be expected, thus contributing to NF-κB  
309 inhibition<sup>31,32</sup>. The work presented here encourages therapeutic strategies directed to favor  
310 homeostatic adaptation associated to NMDA receptor overstimulation, an idea that is  
311 supported by the positive effects of NF-κB inhibition in aging in increasing health and  
312 lifespan<sup>50</sup>.

313

#### 314 **Methods.**

315 **Material.** Chemical reagents were purchased from Sigma (St. Louis, MO, USA), unless  
316 otherwise stated. Neurobasal medium (Cat. N°: 21103-049), B27 (Cat. N° 17504-044), MEM  
317 (Minimum Essential Medium Cell Culture) (Cat. N° 11900-024), FBS (Fetal Bovine Serum)  
318 and Equine Serum (Cat. N° 16050-122) were obtained from Gibco-Invitrogen (San Diego,  
319 CA, USA). Penicillin-Streptomycin was obtained from Biological Industries (Cromwell, CT,  
320 USA). N-Methyl-D-aspartate (NMDA) (Cat. N° 0114), 6-Cyano-7-nitroquinoxaline-2,3-  
321 dione (CNQX) (Cat. N° 0190) and N5-1(1-Iminoethyl)-L-ornithine dihydrochloride (LNIO)  
322 (Cat. N° 0546) were obtained from Tocris Bioscience (Bristol, UK). 2-amino-5-  
323 phosphonovalerate (APV) (Cat. N° A-169) was obtained from RBI (Natick, MA, USA).  
324 Recombinant Escherichia coli-derived BDNF was obtained from Alomone Labs (Jerusalem,  
325 Israel). Ro 106-9920 (6-(Phenylsulfinyl) tetrazolo[1,5-b] pyridazine) (Cat. N° 1778),  
326 Nimodipine (Cat. N° 482200), S-nitroso-N-acetylpenicillamine (SNAP) (Cat. N° 487910)  
327 and 3-amino,4-aminomethyl-2',7'-difluorofluorescein (DAF-FM) (Cat. N° 251515) were  
328 obtained from Calbiochem (San Diego, CA, USA). EZ-link HPDP-Biotin (Cat. N° 21341)  
329 and Streptavidin Agarose (Cat. N° 20347) were obtained from Thermo Scientific, (Waltham,

330 MA, USA). Trypsin Gold was obtained from Promega (Cat. N° V5280) (Madison, WI,  
331 USA).

332 **Antibodies.** *Primary antibodies:* Anti-p65 (Cat. N° ab16502), Anti-I $\kappa$ B alpha (Cat. N°  
333 ab32518), Anti-Laminin-B1 (Cat. N° 8982), Anti-Tubulin Alpha 1A (Cat N° ab7291) and  
334 Anti-GAPDH (Cat. N° ab8245) were from Abcam (Cambridge, UK). Anti-phospho-p65 was  
335 obtained from Cell signaling (Cat. N° 3033) (Danvers, MA, USA), Anti-MAP2A/2B was  
336 obtained from Millipore (Cat. N° MAB378) (Burlington, MA, USA), Anti-GFAP was  
337 obtained from US Biological (Cat. N° G2032-28B-PE) (Swampscott, MA, USA), Anti- $\beta$ III  
338 tubulin was obtained from Promega (Cat. N° G712A) (Madison, WI, USA), Anti-GluN2A  
339 was obtained from Alomone Labs (Cat. N° AGC-002) (Jerusalem, Israel), Anti-SAPAP4 was  
340 obtained from Santa Cruz Biotechnology (Cat. N° sc-86851) (Dallas, TX, USA), Anti-Biotin  
341 was obtained from Bethyl laboratories (Cat. N° A150-111A) (Montgomery, TX, USA) and  
342 Anti-PSD-95 was obtained from BD transduction Laboratories (Cat. N° 610495) (San Jose,  
343 CA, USA). *Secondary Antibodies:* HRP Goat anti Rabbit IgG (Cat. N° 926-80011) and HRP  
344 Goat anti-Mouse IgG (Cat. N° 926-80010) were from LI-COR Biosciences (Lincoln, NE,  
345 USA), Alexa Fluor® 555 goat anti rabbit IgG (Cat. N° A21429) was obtained from Life  
346 Technologies (Carlsbad, CA, USA), Alexa Fluor® 488 Goat Anti-Mouse IgG (Cat. N°  
347 A21202) was obtained from Invitrogen Corporation (Carlsbad, CA, USA).

348 **Neuronal cultures.** Primary cultures of cortical (CX) and hippocampal (HP) neurons were  
349 obtained from day-18 Sprague–Dawley rat embryos, as described<sup>16</sup>. Procedures involving  
350 animals and their care were approved by the Universidad de los Andes Bioethical Committee  
351 and performed in accordance to the ARRIVE Guidelines. Neurons were cultured in the  
352 absence of Cytosine arabinoside (AraC) and contained about 30% of astrocytes<sup>17</sup>. The  
353 excitotoxic stimulation was induced by addition of 30 to 100  $\mu$ M NMDA and 10  $\mu$ M glycine  
354 for 60 minutes. When indicated, the NMDA stimulus was applied after a 15 min  
355 preincubation with 10  $\mu$ M LNIO, 2  $\mu$ M Ro 106-9920 or 10  $\mu$ M SNAP.

356 **Cell fractionation.** Cell fractionation was performed immediately after the excitotoxic  
357 stimulation (NMDA + glycine for 1 hour). Cells were harvested in buffer A (0.6% NP40 v/v;  
358 in mM: 150 NaCl; 10 HEPES pH 7.9; 1 EDTA) and homogenated in Teflon-glass  
359 homogenizer, vortexed for 30 seconds and incubated on ice for 10 minutes. This procedure  
360 was repeated 3 times. The suspension was centrifuged at 17,000 g by 5 minutes to obtain the

361 cytoplasmic fraction. The pellet was washed with buffer B (in mM: 150 NaCl; 10 HEPES  
362 pH 7.4; 1 EDTA) and centrifuged at 17,000 g by 1 minute at 4°C, resuspended in buffer C  
363 (25% v/v glycerol; in mM 20 HEPES pH 7.4; 400 NaCl; 1.2 MgCl<sub>2</sub>; 0.2 EDTA), vortexed  
364 for 30 seconds and incubated on ice for 10 minutes (5 times) to finally centrifuge at 17,000  
365 g for 20 minutes to obtain the nuclear fraction.

366 **Cell viability.** The percentage of surviving neurons was assessed 24 h after the NMDA  
367 challenge using the trypan blue exclusion test, in 24 well plates containing 10,000 cells.  
368 Neurons were exposed to 0.05% (v/v) trypan blue in PBS for 5 minutes. The cells were  
369 immediately examined under a phase-contrast microscope, images of ten random fields were  
370 recorded to quantify the numbers of living neurons (which exclude trypan blue) and dead  
371 (stained) neurons.

372 **Immunocytochemistry.** Neuronal cultures of 14 to 15 DIV were fixed immediately after the  
373 excitotoxic insult with 4% paraformaldehyde in PBS containing 4% of sucrose for 10 minutes  
374 and washed with PBS. After fixation the cells were permeabilized with 0.2% Triton X-100  
375 for 5 minutes and washed with PBS containing 25 mM glycine. Cells were incubated with  
376 blocking solution (10% BSA in PBS) for 1 h followed by overnight incubation with primary  
377 antibody: anti-p65 (1:300), anti-MAP2A/2B (1:1000) and anti-GFAP (1:1000), all diluted in  
378 the same blocking solution at 4°C. After incubation with primary antibody, cells were washed  
379 with PBS, blocked for 30 minutes with 10% BSA and incubated for one hour at room  
380 temperature with the corresponding secondary antibody diluted 1:1000 in blocking solution  
381 and finally incubated with DAPI for 5 minutes for nuclear staining. The fluorescence images  
382 were obtained using ECLIPSE TE2000U Microscope with NIS-Element imaging software  
383 from Nikon Instrument Inc (Minato, Tokio, Japan), and analyzed using Photoshop CS6  
384 software. In order to assess the nuclear translocation of NF-κB by epifluorescence  
385 microscopy, 50 cells per condition (control or NMDA) were analyzed in which the nuclear  
386 (*i.e.*, DAPI stained) zone was selected and the intensity of p65 was quantified in that area by  
387 an experimenter blind to the experimental conditions. Finally, the decodification of the data  
388 allowed the comparison of fluorescence intensity of p65 in control and NMDA stimulated  
389 cultures.

390 **Nitric oxide production.** Neuronal cultures were loaded for 1 h at 37°C with 10 μM 4-amino-  
391 5-methylamino-2',7'-difluorofluorescein (DAF-FM) plus 0.015% pluronic acid in recording

392 solution (in mM: 116 NaCl, 5.4 KCl, 0.9 NaH<sub>2</sub>PO<sub>4</sub>, 1.8 CaCl<sub>2</sub>, 0.9 MgCl<sub>2</sub>, 20 HEPES, 10  
393 glucose and 0.1 L-arginine, pH 7.4). Cells were washed 4 times and placed in recording  
394 solution. Fluorescence (excitation at 495 nm; emission at 510 nm) were acquired for 500 ms  
395 every 5 minutes to minimize the photobleaching of DAF-FM<sup>73</sup>. Signals were averaged over  
396 regions of interest of somas (excluding the nuclei) and relative intracellular NO levels were  
397 calculated from emission at 510 nm. Because there was a linear decay of fluorescence due to  
398 photobleaching, the negative slope was determined for each experiment before the addition  
399 of the stimulus (BDNF), and the experimental slope was corrected for this<sup>16</sup>. At the end of  
400 the experiment, the external NO donor S-Nitroso-N-acetyl-DL-penicillamine (SNAP, 10  
401 μM) was applied to check that NO-sensitive dye was still available. Experiments in which  
402 SNAP did not increase fluorescence were discarded. Fluorescence was measured using an  
403 Eclipse E400 epifluorescence microscope with a FluorX40 water immersion objective  
404 (Nikon Corporation, Melville, NY, USA) equipped with a Sutter Lambda 10-2 optical filter  
405 changer. Emitted fluorescence was registered with a cooled charge-coupled device video  
406 camera (Retiga 2000R Fast 1394, QImaging, Surrey, BC, Canada) and data obtained were  
407 processed using imaging software (IPLab 4.0, Scanalytics, Buckinghamshire, UK).

408 ***High resolution proteome analysis and label free quantitation.*** The proteins pulled down  
409 in the biotin switch assay were boiled in denaturing SDS-sample buffer and subjected to  
410 SDS-PAGE (n=6 biological replicates for each experimental condition except for  
411 hippocampal neurons incubated with NMDA (n=5)). SDS-gels (3% stacking gel, 12%  
412 separation gel) were run in a Mini PROTEAN® System (BioRad) at 100 V for 10 min and  
413 200 V till end of the separation. Each lane was divided in eight fractions for in-gel-digestion  
414 and further analysis. In-gel digest was performed in an adapted manner according to  
415 Shevchenko<sup>74</sup>. LC-MS/MS analyses of the generated peptides were performed on a hybrid  
416 dual-pressure linear ion trap/orbitrap mass spectrometer (LTQ Orbitrap Velos Pro, Thermo  
417 Scientific, San Jose, CA) equipped with an EASY-nLC Ultra HPLC (Thermo Scientific, San  
418 Jose, CA). Peptide samples were dissolved in 10 μl 2% ACN/0.1% trifluoric acid (TFA) and  
419 fractionated on a 75 μm I.D., 25 cm PepMap C18-column, packed with 2 μm resin (Dionex,  
420 Germany). Separation was achieved through applying a gradient from 2% ACN to 35% ACN  
421 in 0.1% FA over a 150 min gradient at a flow rate of 300 nl/min. The LTQ Orbitrap Velos  
422 Pro MS has exclusively used CID-fragmentation when acquiring MS/MS spectra consisted

423 of an Orbitrap full MS scan followed by up to 15 LTQ MS/MS experiments (TOP15) on the  
424 most abundant ions detected in the full MS scan. Essential MS settings were as follows: full  
425 MS (FTMS; resolution 60,000; m/z range 400-2000); MS/MS (Linear Trap; minimum signal  
426 threshold 500; isolation width 2 Da; dynamic exclusion time setting 30 s; singly-charged ions  
427 were excluded from selection). Normalized collision energy was set to 35%, and activation  
428 time to 10 ms. Raw data processing and protein identification of the high resolution Orbitrap  
429 data sets was performed by PEAKS software suite (Bioinformatics Solutions, Inc., Canada).  
430 False discovery rate (FDR) was set to < 1%.

431 **Western blotting.** Twenty micrograms of protein of each sample, dissolved at 1 mg/ml in  
432 loading buffer, were separated by sodium dodecyl sulfate–polyacrylamide electrophoresis  
433 (SDS–PAGE) on 10% gels under fully reducing conditions and transferred onto  
434 nitrocellulose membranes. Membranes were incubated overnight at 4°C with primary  
435 antibodies followed by incubation at room temperature with secondary antibody conjugated  
436 with horseradish peroxidase for 60 min. Immunoreactivity was visualized using the ECL  
437 detection system. Densitometric quantification was performed using the image processing  
438 program ImageJ (National Institute of Health, USA). Data were expressed as fold change  
439 from homogenate for at least 4 independent preparations and mean  $\pm$  SEM for each fraction  
440 was calculated.

441 **Quantitative PCR.** Total RNA from primary hippocampal cultures was extracted using  
442 TRizol reagent from Life technologies (Carlsbad, CA, USA), 1  $\mu$ g of RNA was reverse  
443 transcribed into cDNA using MultiScribe reverse transcriptase from ThermoFisher  
444 (Waltham, MA, USA) according to the manufacturer’s protocol. Quantitative polymerase  
445 chain reaction (qPCR) reaction was carried out using the Brilliant III Ultra-Fast QPCR  
446 Master Mix in the Stratagene Mx3000P system (Agilent Technologies, Santa Clara, CA,  
447 USA). The thermal cycling protocol was: pre-incubation, 95°C, 10 min; amplification, 40  
448 cycles of (95°C, 20 s; 60°C, 20 s; 72°C, 20 s); melting curve, 1 cycle of (95°C, 1 min; 55°C,  
449 30 s; 95°C, 30 s). qPCR was performed using triplicates. Primers used were: rat IL-1 $\beta$ , forward  
450 primer 5’ TCAGGAAGGCAGTGTCACTCATTG 3’ and reverse primer 5’  
451 ACACACTAGCAGGTCGTCATCATC 3’. The results were normalized against rat mRNA  
452 of GAPDH, Forward primer 5’ TTCACCACCATGGAGAAGGC 3’ and reverse primer 5’  
453 GGCATGGACTGTGGTCATGA 3’. The gene expression was represented by the value of

454  $\Delta$ Ct (Sample Problem Ct – Reference Gene Ct). The relative expression is expressed as fold  
455 change over control using the  $2^{-\Delta\Delta Ct}$  expressed on base 2 logarithmic scale.

456

457 ***Knockdown of eNOS.*** Short hairpin against eNOS (sh-eNOS) was synthesized in integrated  
458 DNA technologies (IDT) (Neward, NJ, USA), aligned and expressed in the lentiviral vector  
459 pLL3.7-mRuby2, downstream of the U6 promoter and between HpaI and XhoI sites. The sh-  
460 eNOS sequence was: 5'-GTGTGAAGGCGACTATCCTGTATGGCTCT-3'. The scrambled  
461 RNA (sh-Luc) sequence was: 5'-TTCTCCGAACGTGTCACGT-3'. Correct insertions of the  
462 shRNA cassettes were confirmed by restriction mapping and direct DNA sequencing.  
463 Lentiviral production was done using lipofectamine 2000 reagent, Promega (Cat. N° 11668-  
464 019) (Madison, WI, USA). Briefly, we co-transfected the sh-eNOS or sh-Luc plasmids with  
465 the packaging vector  $\Delta$ 8.91 and the envelope vector VSV-g into HEK293T cells in free serum  
466 DMEM. 5 hours after transfection the medium was replaced for DMEM containing 10% FBS  
467 and the next day the medium was replaced by Neurobasal supplemented with B27. The  
468 resulting supernatant contained the lentiviruses (Naldini et al., 1996; Dull et al., 1998).

469 ***Magnetofection of primary neurons.*** Neuronal cultures of 7 DIV were transfected using  
470 magnetic nanoparticles (NeuroMag, Oz Biosciences). Briefly, plasmid DNA of Firefly and  
471 Renilla Luciferase were incubated with NeuroMag Transfection Reagent (in a relationship  
472 of 2  $\mu$ l per 1  $\mu$ g of DNA) in Neurobasal medium, added to the cultures to incubate for 15  
473 minutes at 37°C on the magnetic plate.

474 ***Dual luciferase assay.***

475 Transfected neuronal cultures with the NF- $\kappa$ B reporter Firefly Luciferase plasmid (Cat. N°  
476 E1980, Promega, Madison, WI, USA), were stimulated with NMDA/glycine for 60 minutes,  
477 in the presence or absence of the NO inhibitor N5-(1-Iminoethyl)-L-ornithine (LNIO). After  
478 stimulation, the cells were returned to fresh Neurobasal/B27 medium containing 10  $\mu$ M  
479 CNQX, 2  $\mu$ M nimodipine and 10  $\mu$ M APV (to block  $\alpha$ -amino-3-hydroxy-5-methylisoxazole-  
480 4-propionate (AMPA) receptors, Ca<sup>2+</sup> channels and NMDA receptors, respectively) during 4  
481 hours to perform the Dual-Luciferase Reporter Assay, according to the manufacturer's  
482 protocol and carried out in FLx800 Luminometer, Biotek instrument (Winooski, VT, USA).  
483 The data were expressed as the ratio of Firefly to Renilla Luciferase activity.



484 **Biotin switch method.** The protocol of Forrester et al. was applied with minor modifications  
485 (Supplemental Figure S1A-C)<sup>25</sup>. The complete procedure was performed in the dark.  
486 Neuronal cultures were homogenized in HENS buffer (in mM: 250 HEPES, 1 EDTA, 1  
487 neocuproine, 0.1 % SDS y and protease inhibitors, pH 7.4) plus 100 mM iodoacetamide (IA).  
488 Briefly, 1 mg of starting material was blocked with 100 mM of IA in HENS buffer in a final  
489 volume of 2 ml in a rotating wheel for 1 h at room temperature, then proteins were  
490 precipitated with 3 volumes of acetone at -20°C and centrifuged at 3000 g for 10 minutes to  
491 discard the supernatant (this step was repeated two times). The blocking procedure was  
492 repeated once more. After careful resuspension, the labeling reaction was performed in the  
493 dark using 300 µl of HENS buffer containing final concentrations of 33 mM sodium  
494 ascorbate and 1 mM N-[6-(biotinamido)hexyl]-3'-(2'-pyridyldithio)- propionamide (Biotin-  
495 HPDP) (Pierce Biotechnology) biotin-HPDP. This ascorbate concentration to reduce -SNO  
496 residues falls within the wide range of concentrations suggested in the literature for  
497 ascorbate-based methods for SNO protein enrichment (i.e. from 10 to 200 mM)<sup>34,38,75</sup>. Then,  
498 biotinylated proteins were pulled down overnight with 200 µl of streptavidin-agarose beads  
499 in a final volume of 1 ml at 4 °C. Elution was performed with SDS gel electrophoresis loading  
500 buffer.

501 **Statistical Analysis.** Average values are expressed as means ± SEM. Statistical significance  
502 of results was assessed using two-tailed Student's t-test or one-way ANOVA followed by  
503 Bonferroni post-tests, as indicated. All statistic data are summarized in Supplemental Table  
504 1.

505

506 **Acknowledgements:** We thank Albert M Galaburda (Department of Neurology, Beth Israel  
507 Deaconess Medical Center and Harvard Medical School, Boston, MA) for critically  
508 reviewing the manuscript. This work was supported by Regular Fondecyt Project 1140108  
509 to UW (Conicyt, Chile) and Regular Fondecyt Project 1200693 (ANID, Chile) to UW.  
510 Centrifugation steps were performed thanks to Project Fondecyt EQM40131.

511 **Conflict of interests:** authors declare no conflict of interests.

512 **Author Contribution:** UW and TK designed the experiments and wrote the manuscript, AC  
513 prepared the final version of all figures and of the manuscript. FB, CL and KHS revised  
514 carefully the manuscript. MV designed molecular tools and supervised experiments (eNOS

515 knockdown and dual luciferase assay). FG initiated biotin switch assay. The experimental  
516 work was done by: Figure 1, KC generated data of panels A-D, AC generated E-F; Figure 2,  
517 generated by KC; Figure 3, generated by BM; Figure 4, generated by AC; Figure 5, generated  
518 by AC and KC; Figure 6, BM did the biotin switch and generated the data of A to D, F, G;  
519 TK supervised the mass spectrometry; AE did the bio-informatic analysis.

520

## 521 **References**

- 522 1. Olloquequi J, *et al.* Excitotoxicity in the pathogenesis of neurological and psychiatric  
523 disorders: Therapeutic implications. *Journal of psychopharmacology*. **3**, 265-275 (2018).  
524
- 525 2. Tymianski M. Emerging mechanisms of disrupted cellular signaling in brain ischemia.  
526 *Nature neuroscience*. **11**, 1369-1373 (2011).  
527
- 528 3. Wu QJ, Tymianski M. Targeting NMDA receptors in stroke: new hope in neuroprotection.  
529 *Molecular brain*. **1**, 15 (2018).  
530
- 531 4. Wang YR, *et al.* Cathepsin L plays a role in quinolinic acid-induced NF-Kappab activation  
532 and excitotoxicity in rat striatal neurons. *PLoS one*. **9**, e75702 (2013).  
533
- 534 5. Sakamoto K, *et al.* Activation inhibitors of nuclear factor kappa B protect neurons against  
535 the NMDA-induced damage in the rat retina. *Journal of pharmacological sciences* (2017).  
536
- 537 6. Li Y, *et al.* Clonidine preconditioning improved cerebral ischemia-induced learning and  
538 memory deficits in rats via ERK1/2-CREB/ NF-kappaB-NR2B pathway. *European journal of*  
539 *pharmacology*, 167-173 (2018).  
540
- 541 7. Kaltschmidt B, Kaltschmidt C. NF-KappaB in Long-Term Memory and Structural Plasticity in  
542 the Adult Mammalian Brain. *Frontiers in molecular neuroscience*, 69 (2015).  
543
- 544 8. Dresselhaus EC, Meffert MK. Cellular Specificity of NF-kappaB Function in the Nervous  
545 System. *Frontiers in immunology*, 1043 (2019).  
546
- 547 9. Kelleher ZT, Matsumoto A, Stamler JS, Marshall HE. NOS2 regulation of NF-kappaB by S-  
548 nitrosylation of p65. *The Journal of biological chemistry*. **42**, 30667-30672 (2007).  
549
- 550 10. Perkins ND. Cysteine 38 holds the key to NF-kappaB activation. *Molecular cell*. **1**, 1-3  
551 (2012).  
552
- 553 11. Sen N, *et al.* Hydrogen sulfide-linked sulphydration of NF-kappaB mediates its  
554 antiapoptotic actions. *Molecular cell*. **1**, 13-24 (2012).  
555
- 556 12. Calabrese V, *et al.* Nitric oxide in the central nervous system: neuroprotection versus  
557 neurotoxicity. *Nature reviews Neuroscience*. **10**, 766-775 (2007).  
558

- 559 13. Forstermann U, Sessa WC. Nitric oxide synthases: regulation and function. *European heart*  
560 *journal*. **7**, 829-837, 837a-837d (2012).  
561
- 562 14. Chong CM, *et al.* Roles of Nitric Oxide Synthase Isoforms in Neurogenesis. *Molecular*  
563 *neurobiology*. **3**, 2645-2652 (2018).  
564
- 565 15. Caviedes A, *et al.* Endothelial Nitric Oxide Synthase Is Present in Dendritic Spines of  
566 Neurons in Primary Cultures. *Frontiers in cellular neuroscience*, 180 (2017).  
567
- 568 16. Sandoval R, *et al.* Homeostatic NMDA receptor down-regulation via brain derived  
569 neurotrophic factor and nitric oxide-dependent signalling in cortical but not in  
570 hippocampal neurons. *Journal of neurochemistry*. **5**, 760-772 (2011).  
571
- 572 17. Meberg PJ, Miller MW. Culturing hippocampal and cortical neurons. *Methods in cell*  
573 *biology*, 111-127 (2003).  
574
- 575 18. Gascon S, *et al.* Excitotoxicity and focal cerebral ischemia induce truncation of the NR2A  
576 and NR2B subunits of the NMDA receptor and cleavage of the scaffolding protein PSD-95.  
577 *Molecular psychiatry*. **1**, 99-114 (2008).  
578
- 579 19. Hoque A, *et al.* Quantitative proteomic analyses of dynamic signalling events in cortical  
580 neurons undergoing excitotoxic cell death. *Cell death & disease*. **3**, 213 (2019).  
581
- 582 20. Lopez-Menendez C, *et al.* Excitotoxic targeting of Kidins220 to the Golgi apparatus  
583 precedes calpain cleavage of Rap1-activation complexes. *Cell death & disease*. **7**, 535  
584 (2019).  
585
- 586 21. Pose-Utrilla J, *et al.* Excitotoxic inactivation of constitutive oxidative stress detoxification  
587 pathway in neurons can be rescued by PKD1. *Nature communications*. **1**, 2275 (2017).  
588
- 589 22. Huang B, Yang XD, Lamb A, Chen LF. Posttranslational modifications of NF-kappaB:  
590 another layer of regulation for NF-kappaB signaling pathway. *Cellular signalling*. **9**, 1282-  
591 1290 (2010).  
592
- 593 23. Siew JJ, *et al.* Galectin-3 is required for the microglia-mediated brain inflammation in a  
594 model of Huntington's disease. *Nature communications*. **1**, 3473 (2019).  
595
- 596 24. Swinney DC, *et al.* A small molecule ubiquitination inhibitor blocks NF-kappa B-dependent  
597 cytokine expression in cells and rats. *The Journal of biological chemistry*. **26**, 23573-23581  
598 (2002).  
599
- 600 25. Forrester MT, Foster MW, Stamler JS. Assessment and application of the biotin switch  
601 technique for examining protein S-nitrosylation under conditions of pharmacologically  
602 induced oxidative stress. *The Journal of biological chemistry*. **19**, 13977-13983 (2007).  
603
- 604 26. Paige JS, Xu G, Stancevic B, Jaffrey SR. Nitrosothiol reactivity profiling identifies S-  
605 nitrosylated proteins with unexpected stability. *Chemistry & biology*. **12**, 1307-1316  
606 (2008).

- 607  
608 27. Forrester MT, *et al.* Proteomic analysis of S-nitrosylation and denitrosylation by resin-  
609 assisted capture. *Nature biotechnology*. **6**, 557-559 (2009).  
610  
611 28. Xu F, *et al.* The Effect of Mitochondrial Complex I-Linked Respiration by Isoflurane Is  
612 Independent of Mitochondrial Nitric Oxide Production. *Cardiorenal medicine*. **2**, 113-122  
613 (2018).  
614  
615 29. Wang H, Kohr MJ, Wheeler DG, Ziolo MT. Endothelial nitric oxide synthase decreases beta-  
616 adrenergic responsiveness via inhibition of the L-type Ca<sup>2+</sup> current. *American journal of*  
617 *physiology Heart and circulatory physiology*. **3**, H1473-1480 (2008).  
618  
619 30. Merino JJ, *et al.* The nitric oxide donor SNAP-induced amino acid neurotransmitter release  
620 in cortical neurons. Effects of blockers of voltage-dependent sodium and calcium channels.  
621 *PloS one*. **3**, e90703 (2014).  
622  
623 31. Kors S, Geijtenbeek K, Reits E, Schipper-Krom S. Regulation of Proteasome Activity by  
624 (Post-)transcriptional Mechanisms. *Front Mol Biosci* (2019).  
625  
626 32. Kapadia MR, *et al.* Nitric oxide regulates the 26S proteasome in vascular smooth muscle  
627 cells. *Nitric Oxide-Biol Ch*. **4**, 279-288 (2009).  
628  
629 33. Kneussel M, Wagner W. Myosin motors at neuronal synapses: drivers of membrane  
630 transport and actin dynamics. *Nature reviews Neuroscience*. **4**, 233-247 (2013).  
631  
632 34. Figueiredo-Freitas C, *et al.* S-Nitrosylation of Sarcomeric Proteins Depresses Myofilament  
633 Ca<sup>2+</sup>)Sensitivity in Intact Cardiomyocytes. *Antioxidants & redox signaling*. **13**, 1017-1034  
634 (2015).  
635  
636 35. Irie T, *et al.* S-Nitrosylation of Calcium-Handling Proteins in Cardiac Adrenergic Signaling  
637 and Hypertrophy. *Circulation research*. **9**, 793-803 (2015).  
638  
639 36. Nogueira L, *et al.* Myosin is reversibly inhibited by S-nitrosylation. *The Biochemical journal*.  
640 **2**, 221-231 (2009).  
641  
642 37. Choi YB, Lipton SA. Redox modulation of the NMDA receptor. *Cellular and molecular life*  
643 *sciences : CMLS*. **11**, 1535-1541 (2000).  
644  
645 38. Ho GP, *et al.* S-nitrosylation and S-palmitoylation reciprocally regulate synaptic targeting  
646 of PSD-95. *Neuron*. **1**, 131-141 (2011).  
647  
648 39. Pansiot J, *et al.* Neuroprotective effect of inhaled nitric oxide on excitotoxic-induced brain  
649 damage in neonatal rat. *PloS one*. **6**, e10916 (2010).  
650  
651 40. Garry PS, *et al.* The role of the nitric oxide pathway in brain injury and its treatment--from  
652 bench to bedside. *Experimental neurology*, 235-243 (2015).  
653

- 654 41. Mohammad Jafari R, *et al.* The anticonvulsant activity and cerebral protection of chronic  
655 lithium chloride via NMDA receptor/nitric oxide and phospho-ERK. *Brain research bulletin*,  
656 1-9 (2018).  
657
- 658 42. Lee JW, Lee D-H, Park JK, Han JS. Sodium nitrite-derived nitric oxide protects rat testes  
659 against ischemia/reperfusion injury. *Asian Journal of Andrology*, 92-97 (2019).  
660
- 661 43. Zhao H, *et al.* Neuroprotective effects of troxerutin and cerebroprotein hydrolysate  
662 injection on the neurovascular unit in a rat model of Middle cerebral artery occlusion. *The*  
663 *International journal of neuroscience*, 1-15 (2020).  
664
- 665 44. Zhao H, *et al.* Troxerutin cerebroprotein hydrolysate injection ameliorates neurovascular  
666 injury induced by traumatic brain injury - via endothelial nitric oxide synthase pathway  
667 regulation. *The International journal of neuroscience*. **12**, 1118-1127 (2018).  
668
- 669 45. Dezfulian C, *et al.* Mechanistic characterization of nitrite-mediated neuroprotection after  
670 experimental cardiac arrest. *Journal of neurochemistry*. **3**, 419-431 (2016).  
671
- 672 46. Milanese C, *et al.* Mitochondrial Complex I Reversible S-Nitrosation Improves  
673 Bioenergetics and Is Protective in Parkinson's Disease. *Antioxidants & redox signaling*. **1**,  
674 44-61 (2018).  
675
- 676 47. Ding Y, *et al.* The protective effect of ligustrazine on rats with cerebral ischemia-  
677 reperfusion injury via activating PI3K/Akt pathway. *Human & experimental toxicology*. **10**,  
678 1168-1177 (2019).  
679
- 680 48. Zhang Y, *et al.* Increased GSNOR Expression during Aging Impairs Cognitive Function and  
681 Decreases S-Nitrosation of CaMKIIalpha. *The Journal of neuroscience : the official journal*  
682 *of the Society for Neuroscience*. **40**, 9741-9758 (2017).  
683
- 684 49. Huang YJ, *et al.* Nitric Oxide Participates in the Brain Ischemic Tolerance Induced by  
685 Intermittent Hypobaric Hypoxia in the Hippocampal CA1 Subfield in Rats. *Neurochemical*  
686 *research*. **9**, 1779-1790 (2018).  
687
- 688 50. Zhao J, *et al.* NF-kappaB activation with aging: characterization and therapeutic inhibition.  
689 *Methods in molecular biology*, 543-557 (2015).  
690
- 691 51. Meuchel LW, *et al.* Neurotrophins induce nitric oxide generation in human pulmonary  
692 artery endothelial cells. *Cardiovascular research*. **4**, 668-676 (2011).  
693
- 694 52. Mitre M, Mariga A, Chao MV. Neurotrophin signalling: novel insights into mechanisms and  
695 pathophysiology. *Clinical science*. **1**, 13-23 (2017).  
696
- 697 53. Tejeda GS, *et al.* Prevention of excitotoxicity-induced processing of BDNF receptor TrkB-FL  
698 leads to stroke neuroprotection. *EMBO molecular medicine*. **7**, e9950 (2019).  
699

- 700 54. Tabansky I, *et al.* Molecular profiling of reticular gigantocellularis neurons indicates that  
701 eNOS modulates environmentally dependent levels of arousal. *Proceedings of the National*  
702 *Academy of Sciences of the United States of America.* **29**, E6900-E6909 (2018).  
703
- 704 55. Bhakar AL, *et al.* Constitutive nuclear factor-kappa B activity is required for central neuron  
705 survival. *The Journal of neuroscience : the official journal of the Society for Neuroscience.*  
706 **19**, 8466-8475 (2002).  
707
- 708 56. Qin ZH, *et al.* Nuclear factor kappaB nuclear translocation upregulates c-Myc and p53  
709 expression during NMDA receptor-mediated apoptosis in rat striatum. *The Journal of*  
710 *neuroscience : the official journal of the Society for Neuroscience.* **10**, 4023-4033 (1999).  
711
- 712 57. Kitaoka Y, *et al.* Nuclear factor-kappa B p65 in NMDA-induced retinal neurotoxicity. *Brain*  
713 *research Molecular brain research.* **1-2**, 8-16 (2004).  
714
- 715 58. Zhang W, *et al.* Neuronal activation of NF-kappaB contributes to cell death in cerebral  
716 ischemia. *Journal of cerebral blood flow and metabolism : official journal of the*  
717 *International Society of Cerebral Blood Flow and Metabolism.* **1**, 30-40 (2005).  
718
- 719 59. Kitaoka Y, Munemasa Y, Nakazawa T, Ueno S. NMDA-induced interleukin-1beta expression  
720 is mediated by nuclear factor-kappa B p65 in the retina. *Brain research*, 247-255 (2007).  
721
- 722 60. Peng Y, *et al.* AGE-RAGE signal generates a specific NF-kappaB RelA "barcode" that directs  
723 collagen I expression. *Scientific reports*, 18822 (2016).  
724
- 725 61. Marshall HE, Stamler JS. Inhibition of NF-kappa B by S-nitrosylation. *Biochemistry.* **6**, 1688-  
726 1693 (2001).  
727
- 728 62. Reynaert NL, *et al.* Nitric oxide represses inhibitory kappaB kinase through S-nitrosylation.  
729 *Proceedings of the National Academy of Sciences of the United States of America.* **24**,  
730 8945-8950 (2004).  
731
- 732 63. Mnatsakanyan R, *et al.* Proteome-wide detection of S-nitrosylation targets and motifs  
733 using bioorthogonal cleavable-linker-based enrichment and switch technique. *Nature*  
734 *communications.* **1**, 2195 (2019).  
735
- 736 64. Smith JG, *et al.* Proteomic analysis of S-nitrosylated nuclear proteins in rat cortical  
737 neurons. *Science signaling.* **537** (2018).  
738
- 739 65. Tegeder I. Nitric oxide mediated redox regulation of protein homeostasis. *Cellular*  
740 *signalling*, 348-356 (2019).  
741
- 742 66. Ghasemi M, *et al.* Nitric Oxide and Mitochondrial Function in Neurological Diseases.  
743 *Neuroscience*, 48-71 (2018).  
744
- 745 67. Nakamura T, Lipton SA. Nitrosative Stress in the Nervous System: Guidelines for Designing  
746 Experimental Strategies to Study Protein S-Nitrosylation. *Neurochemical research.* **3**, 510-  
747 514 (2016).

- 748  
749 68. Ba M, *et al.* S-nitrosylation of Src by NR2B-nNOS signal causes Src activation and NR2B  
750 tyrosine phosphorylation in levodopa-induced dyskinetic rat model. *Human &*  
751 *experimental toxicology*. **3**, 303-310 (2019).  
752  
753 69. Akhand AA, *et al.* Nitric oxide controls src kinase activity through a sulfhydryl group  
754 modification-mediated Tyr-527-independent and Tyr-416-linked mechanism. *The Journal*  
755 *of biological chemistry*. **36**, 25821-25826 (1999).  
756  
757 70. Coultrap SJ, Bayer KU. Nitric oxide induces Ca<sup>2+</sup>-independent activity of the  
758 Ca<sup>2+</sup>/calmodulin-dependent protein kinase II (CaMKII). *The Journal of biological chemistry*.  
759 **28**, 19458-19465 (2014).  
760  
761 71. Yu LM, *et al.* Denitrosylation of nNOS induced by cerebral ischemia-reperfusion  
762 contributes to nitrosylation of CaMKII and its inhibition of autophosphorylation in  
763 hippocampal CA1. *European review for medical and pharmacological sciences*. **17**, 7674-  
764 7683 (2019).  
765  
766 72. Gavalda N, Gutierrez H, Davies AM. Developmental switch in NF-kappaB signalling  
767 required for neurite growth. *Development*. **20**, 3405-3412 (2009).  
768  
769 73. Balcerczyk A, Soszynski M, Bartosz G. On the specificity of 4-amino-5-methylamino-2',7'-  
770 difluorofluorescein as a probe for nitric oxide. *Free radical biology & medicine*. **3**, 327-335  
771 (2005).  
772  
773 74. Shevchenko A, Wilm M, Vorm O, Mann M. Mass spectrometric sequencing of proteins  
774 silver-stained polyacrylamide gels. *Analytical chemistry*. **5**, 850-858 (1996).  
775  
776 75. Thompson JW, Forrester MT, Moseley MA, Foster MW. Solid-phase capture for the  
777 detection and relative quantification of S-nitrosoproteins by mass spectrometry. *Methods*.  
778 **2**, 130-137 (2013).  
779  
780

## 781 **Figure Legends**

782 **Figure 1.- NF-κB is activated in hippocampal, but not in cortical cultures after**  
783 **incubation with NMDA. A) and B)** Neuronal cultures were stimulated with 30 μM or 100  
784 μM NMDA for 1 hour and nuclear fractions were separated subsequently. Representative  
785 Western blots of cortical (A) and hippocampal (B) culture-derived nuclear fractions after  
786 stimulation with 30 μM (top) or 100 μM (bottom). For each Western blot, equal quantities  
787 of proteins were loaded and Lamin B1 (LamB) was used as loading control. **C) and D)**  
788 Densitometric quantification of relative changes of p65 (C) and phospho-p65 (D) in the  
789 nuclear content, comparing stimulated (NMDA) vs control (non-stimulated) condition in

790 the same Western blot. Calculated results obtained of 6 independent experiments (n=6).  
791 Statistical significance was assessed by two-tailed t-test (\* p<0.05; \*\* p<0.01). **E**) and **F**)  
792 Showing relative luciferase activity in cortical (E) and hippocampal (F) neurons after  
793 stimulation with 30  $\mu$ M or 100  $\mu$ M NMDA for one hour (n=6). Statistical significance was  
794 assessed by One-way ANOVA followed by Bonferroni post-test (\*\*p<0.01).

795

796 **Figure 2.- Inhibition of NF- $\kappa$ B with Ro 106-9920 decreases cell viability in cortical**  
797 **cultures but increases it in hippocampal cell cultures. A)** Effect of different  
798 concentrations of 6-(Phenylsulfinyl)tetrazolo[1,5-b]pyridazine (Ro 106-9920) on cell  
799 viability of cortical and hippocampal cultures **B) and C)** A concentration of 2  $\mu$ M Ro-106-  
800 9920, chosen because it does not affect cell viability per se, was used in 30  $\mu$ M (B) or 100  
801  $\mu$ M (C) NMDA stimulated cultures for one hour. Cell death was detected by Trypan blue  
802 exclusion test. Results obtained in n=4 independent experiments. Statistical significance  
803 was assessed by One-way ANOVA followed by Bonferroni post-test \* p<0.05; \*\* p<0.01;  
804 \*\*\* p<0.001.

805

806 **Figure 3.- Different levels of NF- $\kappa$ B p65 subunit S-nitrosylation (-SNO) in cortical**  
807 **(CX) and hippocampal (HP) cell cultures after stimulation with NMDA.** Neuronal  
808 cultures were stimulated with 30  $\mu$ M NMDA for one hour. Afterwards, cells were  
809 homogenized to pull down S-nitrosylated proteins using the biotin switch assay.  
810 Representative Western blots of the S-nitrosylated p65 subunit of NF- $\kappa$ B and densitometric  
811 quantification of cortical and hippocampal cell cultures are shown comparing stimulated  
812 (NMDA) vs control (non-stimulated) condition in the same Western blot. n=4 independent  
813 experiments and statistical significance was assessed by two-tailed t-test. \*\* p<0.01; \*\*\*  
814 p<0.001, # p<0.01.

815

816 **Figure 4.- eNOS contributes to NO production and S-nitrosylation of selected**  
817 **proteins. A)** Relative increase of NO after the addition of 200 ng/ml BDNF to cortical cell  
818 cultures previously transfected with a shRNA targeting eNOS, sh-Luc shRNA or not



819 transfected controls. **B)** Mean slopes of NO production are shown in n= 4 to 6 independent  
820 experiments, \* p<0.5 by two-way ANOVA followed by Bonferroni post-test. **C)** The  
821 biotin-switch assay was used to pull down S-nitrosylated proteins. Western blots detecting  
822 p65 subunit and tubulin 1 $\alpha$  in the pull downs of cortical and hippocampal cultures are  
823 shown. Cell cultures were transfected with shRNA targeting eNOS or scrambled shRNA.  
824 **D)** Densitometric quantification of the S-nitrosylated (SNO) levels of NF- $\kappa$ B subunit p65  
825 and tubulin  $\alpha$ -1A. Result obtained from n= 4 to 6 independent experiments. \* p<0.05; \*\*  
826 p<0.01; \*\*\* p<0.001 by two-tailed t-test. CX: cortical cultures; HP: hippocampal cultures;  
827 Control: not transfected cortical neurons. Sc= scrambled shRNA sequence, eNOS = short  
828 interfering RNA against eNOS, C – is a negative control for the biotin switch assay (pull  
829 down of samples in which reduction with ascorbate was omitted).

830

831

832 **Figure 5.- Nitric monoxide decreases transcriptional activity and gene expression but**  
833 **not nuclear translocation of NF- $\kappa$ B in response to NMDA stimulation. A) and B)**

834 Representative Western blots and densitometric quantifications of nuclear content of p65 in  
835 cortical (A) and hippocampal (B) cultures stimulates with NMDA (100  $\mu$ M) in presence or  
836 absence of NO inhibitor LNIO (N5-(1-Iminoethyl)-L-ornithine). For each Western blot,  
837 equal quantities of protein were loaded and Lamin B1 (LamB) was used as loading control  
838 for nuclear fraction. All results were obtained in n=5 independent experiments. \* p<0.5; \*\*  
839 p<0.1 by two-way ANOVA followed by Bonferroni post-test. **C) and D)** Relative  
840 luciferase activity in cortical (C) and hippocampal (D) neurons after 30  $\mu$ M and 100  $\mu$ M  
841 NMDA stimulation in presence and absence of LNIO. E) Relative luciferase activity in  
842 hippocampal neurons after NMDA 100  $\mu$ M stimulation in presence and absence of NO  
843 donor SNAP at 10  $\mu$ M (S-nitroso-N-acetylpenicillamine). All results were obtained in n=6  
844 to 10 independent experiments. Statistical significance was assessed by One-way ANOVA  
845 followed by Bonferroni post-test. \* p<0.5; \*\* p<0.1; \*\*\* p<0.001. F and G) IL-1B mRNA  
846 measured by quantitative PCR in hippocampal cultures 2 hours after NMDA 100  $\mu$ M  
847 stimulation in presence or absence of 2  $\mu$ M Ro 106-9920 or 10  $\mu$ M SNAP. Bar graph  
848 showing the mean  $\pm$  SEM fold change normalized against GAPDH as reference. Data

849 obtained from 4 to 8 independent hippocampal cell culture experiments. Statistical  
850 significance was assessed by One-way ANOVA followed by Bonferroni post-test.  
851 \*\* $p < 0.01$ ; \*\*\* $p < 0.001$ .

852

853

854 **Figure 6.- Identification of S-nitrosylated proteins after NMDA stimulation by**  
855 **nanoLC-MS/MS.**

856 S-nitrosylated proteins in hippocampal and cortical cultures were identified by mass  
857 spectrometry after 30  $\mu$ M NMDA (n=6 except for hippocampal neurons incubated with  
858 NMDA (n=5)). A remarkable larger number of S-nitrosylated proteins were detected in  
859 cortical than in hippocampal neurons. **A)** Venn Diagrams showing the distribution of  
860 proteins in cortical vs. hippocampal cultures (using the sum of identified proteins in both,  
861 control and NMDA stimulated cultures). **B)** cortical vs. hippocampal cultures, using  
862 proteins identified under NMDA stimulation. **C)** Proteins identified in control vs NMDA  
863 stimulated cortical cultures **D)** Proteins identified in control vs NMDA stimulated  
864 hippocampal cultures. In C and D, only proteins were considered which were detected at  
865 least two times under each experimental condition. CX= cortical cell cultures,  
866 HP=hippocampal cell cultures. **E)** Meta-analysis of proteomic data using GeneCodis.  
867 Identified proteins exclusively detected in cortical (red) or hippocampal (green) proteomes  
868 were functionally annotated using the web-based tools GeneCodis and Gene Ontology  
869 (GO). A single enrichment analysis of biological processes was performed with each list of  
870 proteins. The obtained data were visualized by building a graph where the nodes are the  
871 proteins that are annotated with the enriched biological processes terms from Gene  
872 Ontology. The connections were made by looking at the enriched terms the Proteins were  
873 annotated with. If two proteins had the same annotation in common, a line was drawn.  
874 When two different colored nodes *i.e.*, proteins are not connected they don't share the same  
875 biological processes. To emphasize the similarities a force field embedder was used to  
876 layout the graph, depicting similar proteins closer to each other. Note that S-nitrosylation  
877 controls different cellular pathways. **F)** Validation by Western blot of S-nitrosylated  
878 proteins that were pulled down with the biotin switch method. **G)** Densitometric

879 quantification of S-nitrosylated (-SNO) proteins in cortical (CX) and hippocampal (HP)  
880 cultures after NMDA stimulation, in n=4 independent experiments. # p<0.05; \* p<0.05; \*\*  
881 p<0.01; \*\*\* p<0.001.

882

883

884 **Figure 7.- Proposed model summarizing the results.** Induced/activated eNOS located at  
885 the excitatory synapse produces NO, leading beside others to NF- $\kappa$ B S-nitrosylation in  
886 cortical cells and inhibiting NF- $\kappa$ B-dependent gene expression. However, under excitotoxic  
887 conditions this eNOS-dependent negative regulation of p65 is not present in hippocampal  
888 cultures. Therefore, NMDA leads to the activation and nuclear translocation of NF- $\kappa$ B,  
889 resulting in a transcriptional activation that includes pro-inflammatory genes, including IL-  
890 1 $\beta$ . The transcriptional activity of NF- $\kappa$ B can be selectively induced in cortical cultures by  
891 inhibiting NOS enzymes with LNIO. Likewise, in hippocampal cultures, the transcriptional  
892 activity (including IL-1 $\beta$  transcription) can be inhibited by the NO donor SNAP.

893

894

895

896

897



# Figure 2

## A

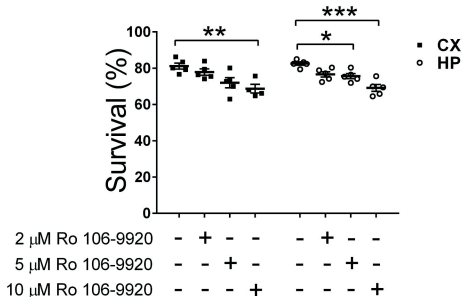

## B

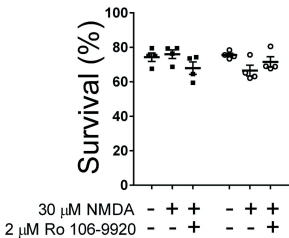

## C

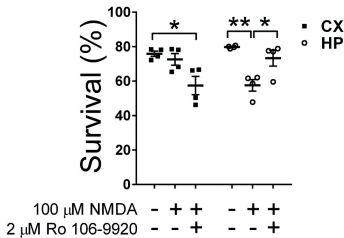

# Figure 3

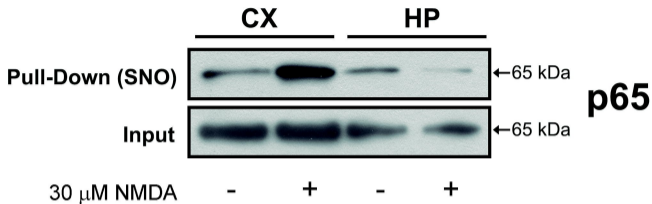

## p65 SNO levels

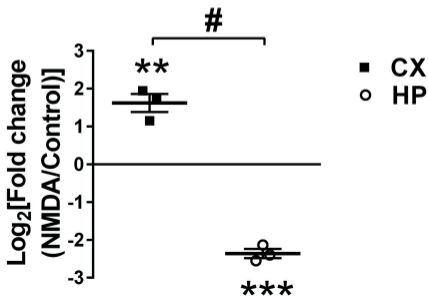

# Figure 4

## A

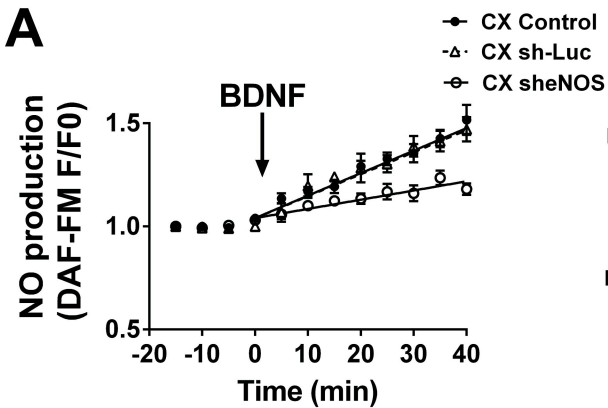

## B

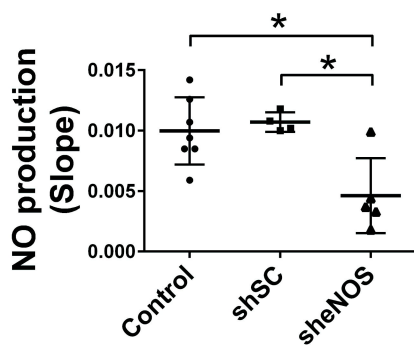

## C

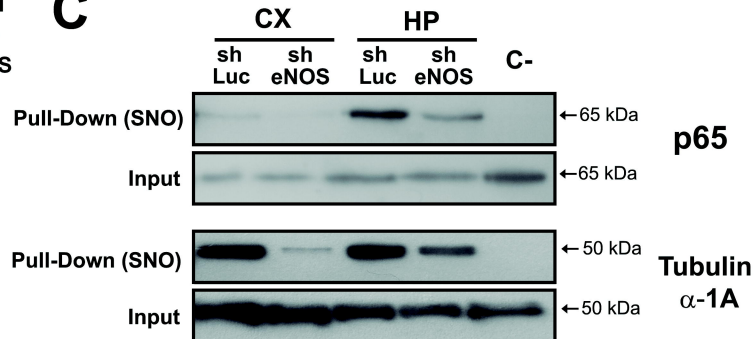

## D

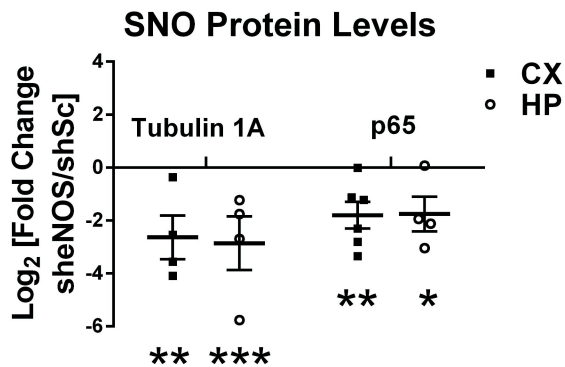

**Figure 5****A CX (Nuclear Fraction)**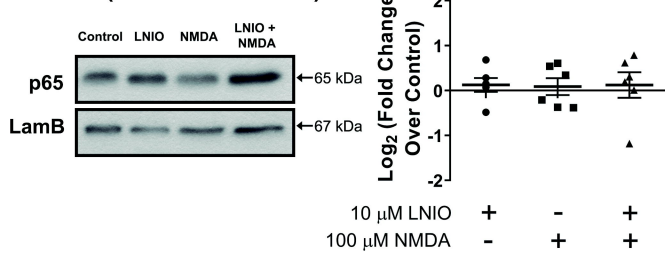**B HP (Nuclear Fraction)**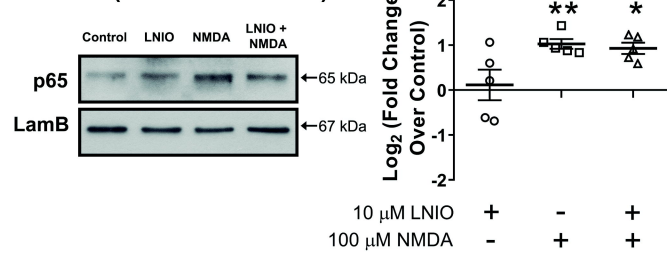**C****CX**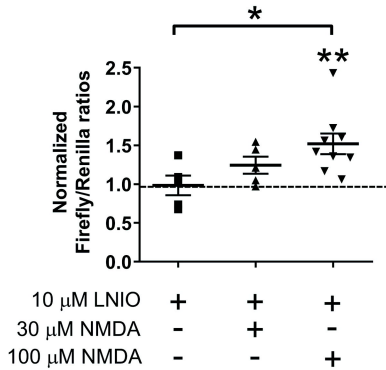**D****HP**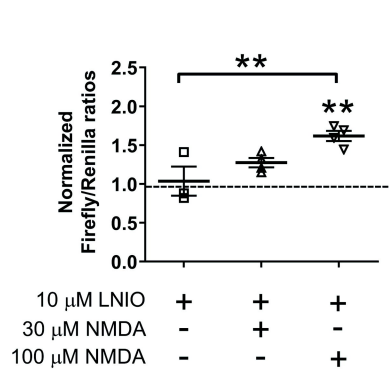**E****HP**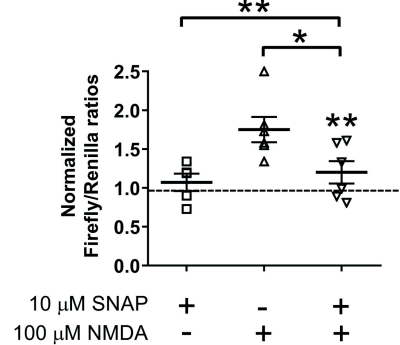**F****HP****mRNA IL-1β**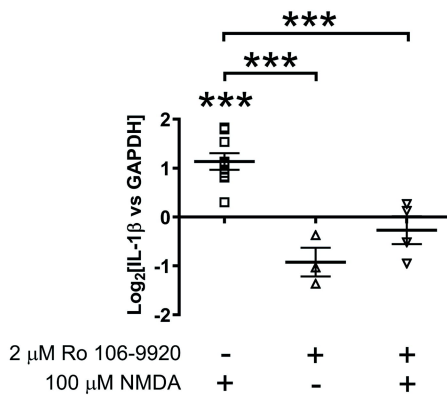**G****HP****mRNA IL-1β**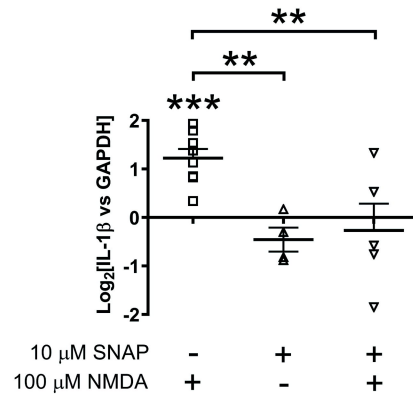



# Figure 6

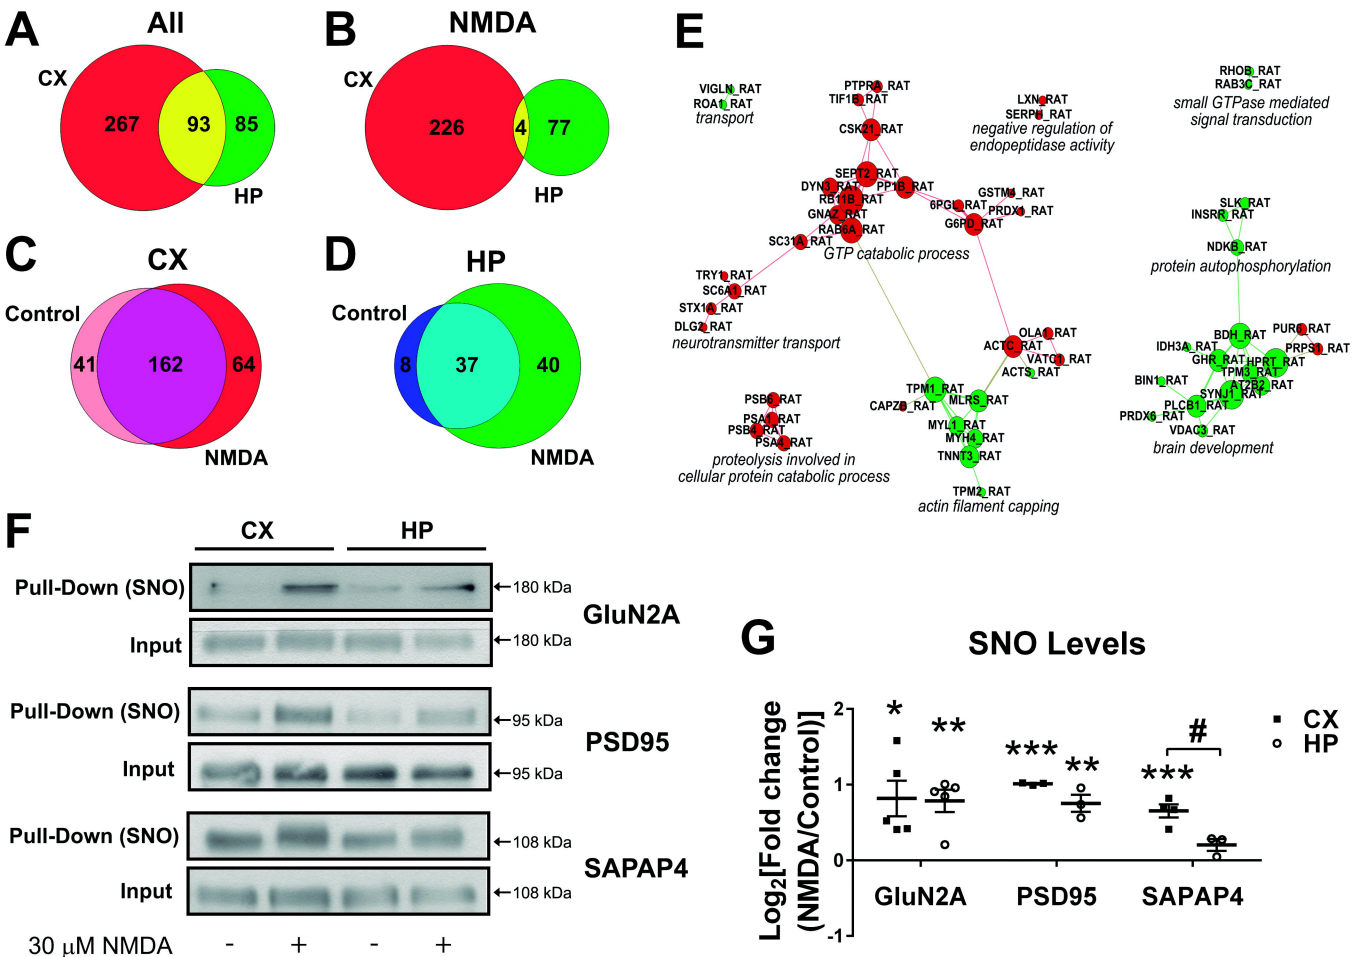

# Figure 7

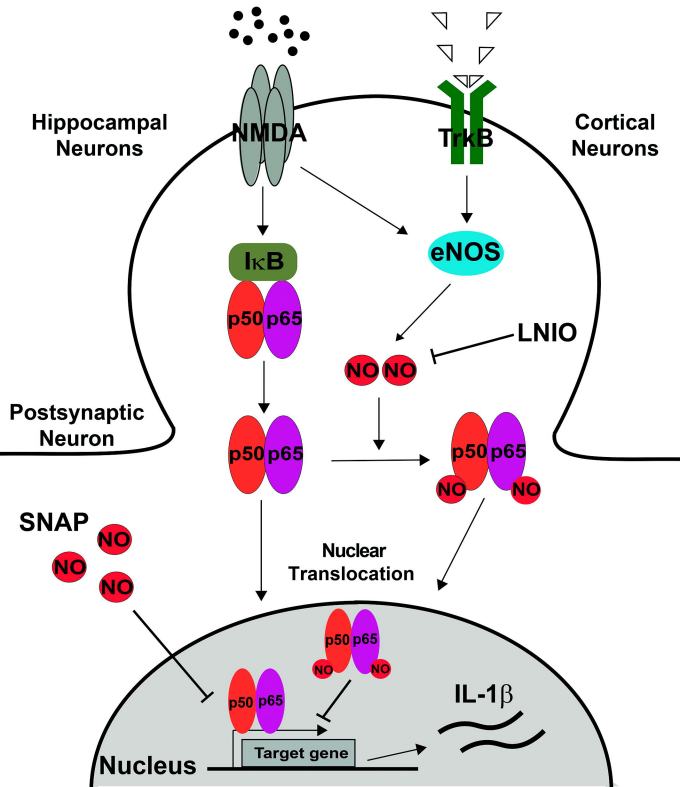

# Figure 1

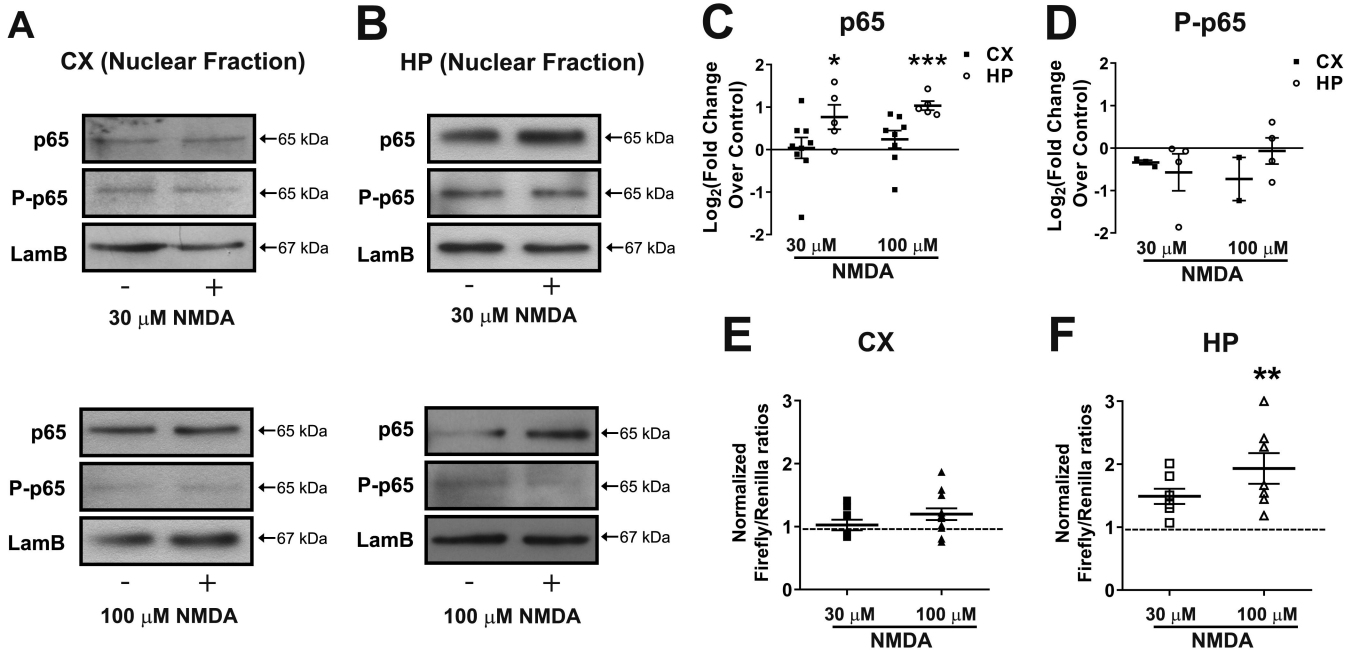

Source: https://www.biorxiv.org/content/10.1101/2020.02.04.932772v3.full.pdf
